# Supplementary material
Source: publisher figshare collection journal article supplement (https://adisjournals.figshare.com/ndownloader/files/35067616)
Supplement: Supplementary file 1 [file 35067616]

## Health-Related Quality of Life with Diroximel Fumarate in Patients with Relapsing Forms of Multiple Sclerosis: Findings from Qualitative Research Using Patient Interviews

Mark Gudesblatt, Cortnee Roman, Barry A. Singer, Hollie Schmidt, Jessica Thomas, Sai L. Shankar, Jennifer Lyons, Shivani Kapadia

**Diroximel fumarate (DRF)** is an oral drug used to treat relapsing multiple sclerosis (MS), an autoimmune disease of the CNS

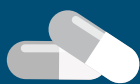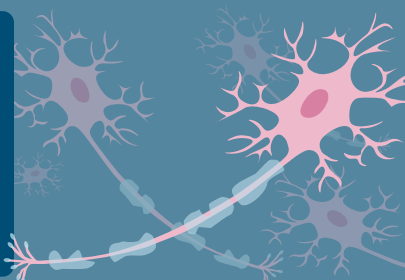

DRF is associated with

- Better gastrointestinal tolerability and lower discontinuation rates than dimethyl fumarate
- High treatment adherence

How do patients feel about DRF treatment and its impact on their **work** and **daily life**?

### DRF Concept Elicitation Study

17 US adults with MS  
11 female, 6 male  
Mean age: 49.3 years

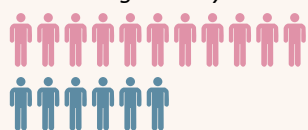

Treatment with DRF

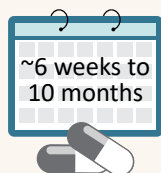

Semi-structured qualitative interview

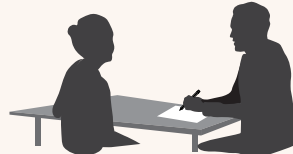

### Key Findings

#### Most meaningful DRF-related concepts

Overall wellness and quality of life

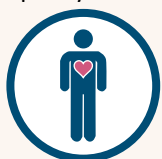

Ease of administration

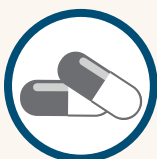

Minimal/manageable side effects

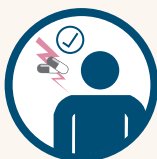

**No impact** on work/daily obligations

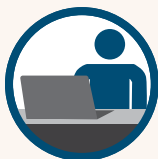

#### Positive aspects

- Easier; more convenient than injections/infusions
- No/mild side effects
- Convenience over injectable/infusion medications
- Effectiveness

#### Negative aspects

- Treatment regimen (twice daily dose)
- Food requirements  
- Although most (94.1%) had no dietary changes since starting treatment

### Limitations

- Study included primarily white patients (n = 16/17; 94%) taking DRF prescribed by one physician
- Patients had only been on DRF for a short duration
- Interviews required patients to accurately recall past experiences with DRF
- COVID-19 pandemic may have affected patient perspectives

### Conclusions

Patients interviewed perceive DRF to have an **enhanced safety profile** and to be **easy to take**, supporting **treatment adherence**

Considering such patient perspectives will aid in treatment selection and potentially improve adherence and outcomes

CNS: Central nervous system

This graphical abstract represents the opinions of the authors. For a full list of declarations, including funding and author disclosure statements, please see the full text online. © The authors, CC-BY-NC 2022.
